# Supplementary material for: From red to blue shift: switching the binding affinity from the acceptor to the donor end by increasing the π-bridge in push–pull chromophores with coordinative ends
Source: Royal Society of Chemistry journal article supplement (doi:10.1039/c3nj00466j), 2013-01-01
Supplement: c3nj00466j.pdf [file c3nj00466j.pdf]

*Supporting Information for:*

**From Red to Blue Shift: Switching the Binding Affinity  
from Acceptor to the Donor End by Increasing the  $\pi$ -Bridge  
in Push-Pull Chromophores with Coordinative Ends**

*Marco Caricato,<sup>a</sup> Carmine Coluccini,<sup>a</sup> Douglas Vander Griend,<sup>b</sup>*

*Alessandra Forni,<sup>c</sup> and Dario Pasini<sup>\*a,d</sup>*

<sup>a</sup> Department of Chemistry, University of Pavia, Viale Taramelli, 10–27100 Pavia, Italy. Fax: +39 0382 987323; Tel: +39 0382 987835; E-mail: dario.pasini@unipv.it Website: www.unipv.it/labt

<sup>b</sup> Department of Chemistry & Biochemistry, Calvin College, Grand Rapids, MI 49546-4403- USA.

<sup>c</sup> Institute of Molecular Sciences and Technologies (ISTM), CNR, Via Golgi 19, 20133 Milano, Italy

<sup>d</sup> INSTM Research Unit, University of Pavia.

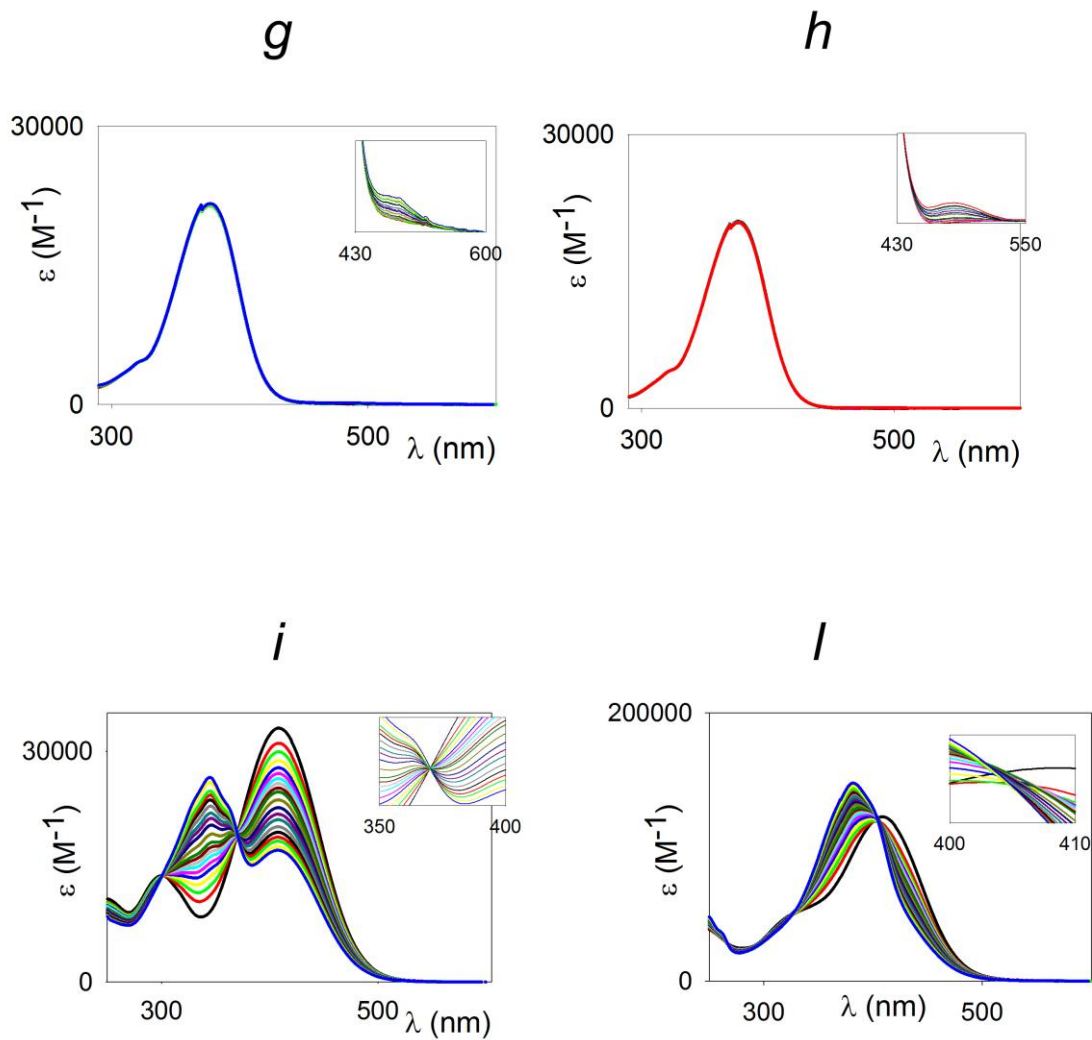

**Figure S1.** UV/Vis titration experiments with  $Er(OTf)_3$  in MeCN for ligands **1** (left, **g** and **h**, with  $Yb^{3+}$ ), **2** ( titration **i**), and **3** (titration **l**).

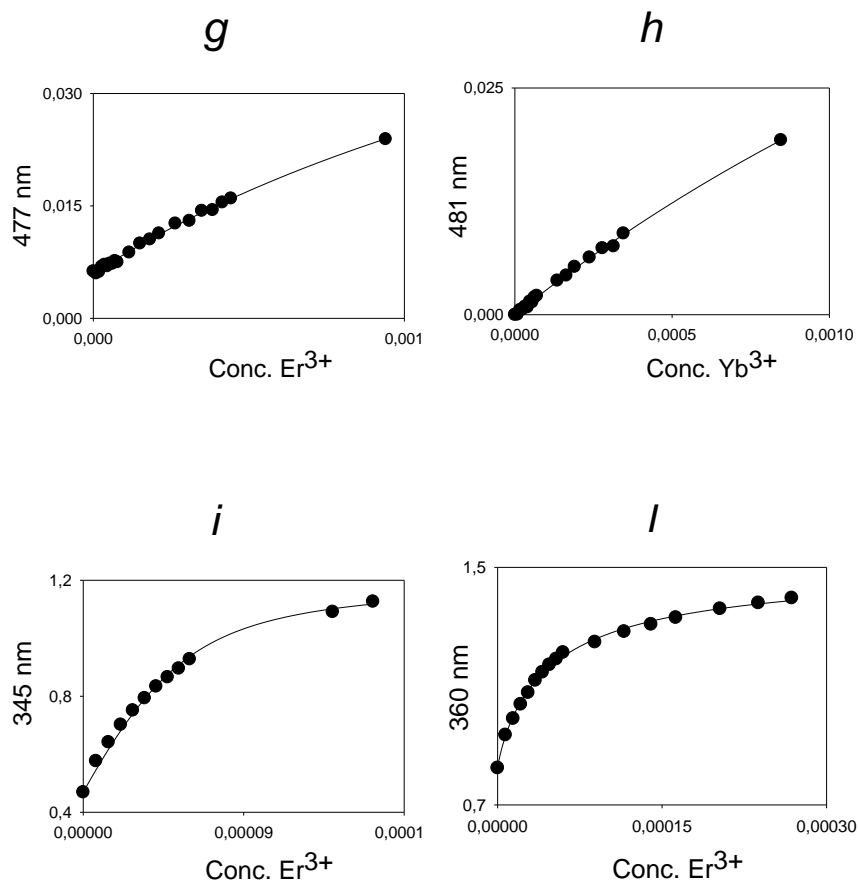

**Figure S2.** Titration profiles (ascending, wavelenghts indicated on the y axes) and best fit curves corresponding to the titrations shown in Figure S4.

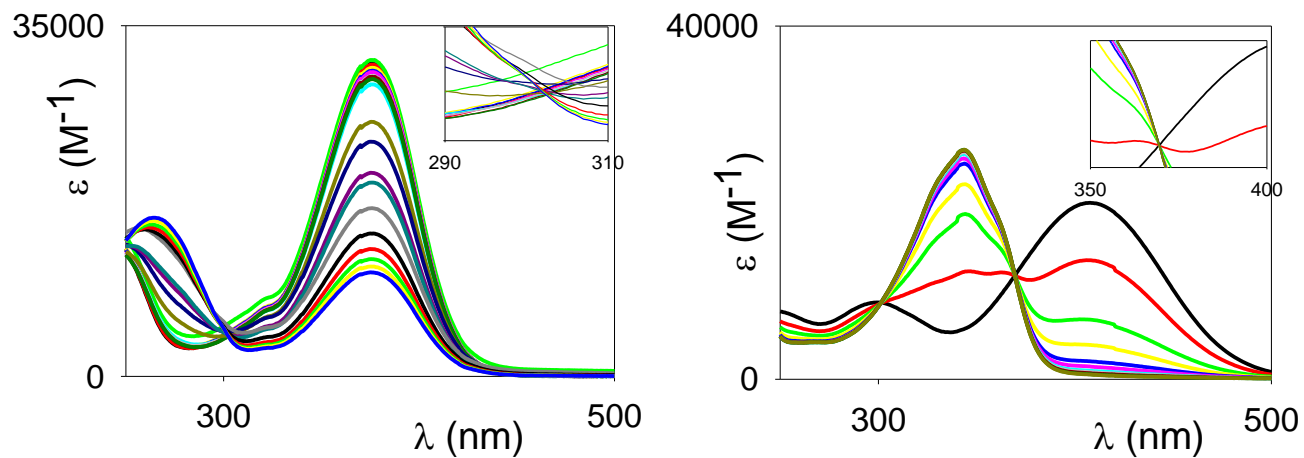

**Figure S3.** Left: Duplicate titration of **1** with  $Sc(OTf)_3$ . The isosbestic point is missing. Right: Duplicate titration of **2** with  $Sc(OTf)_3$ . The isosbestic point is holding.

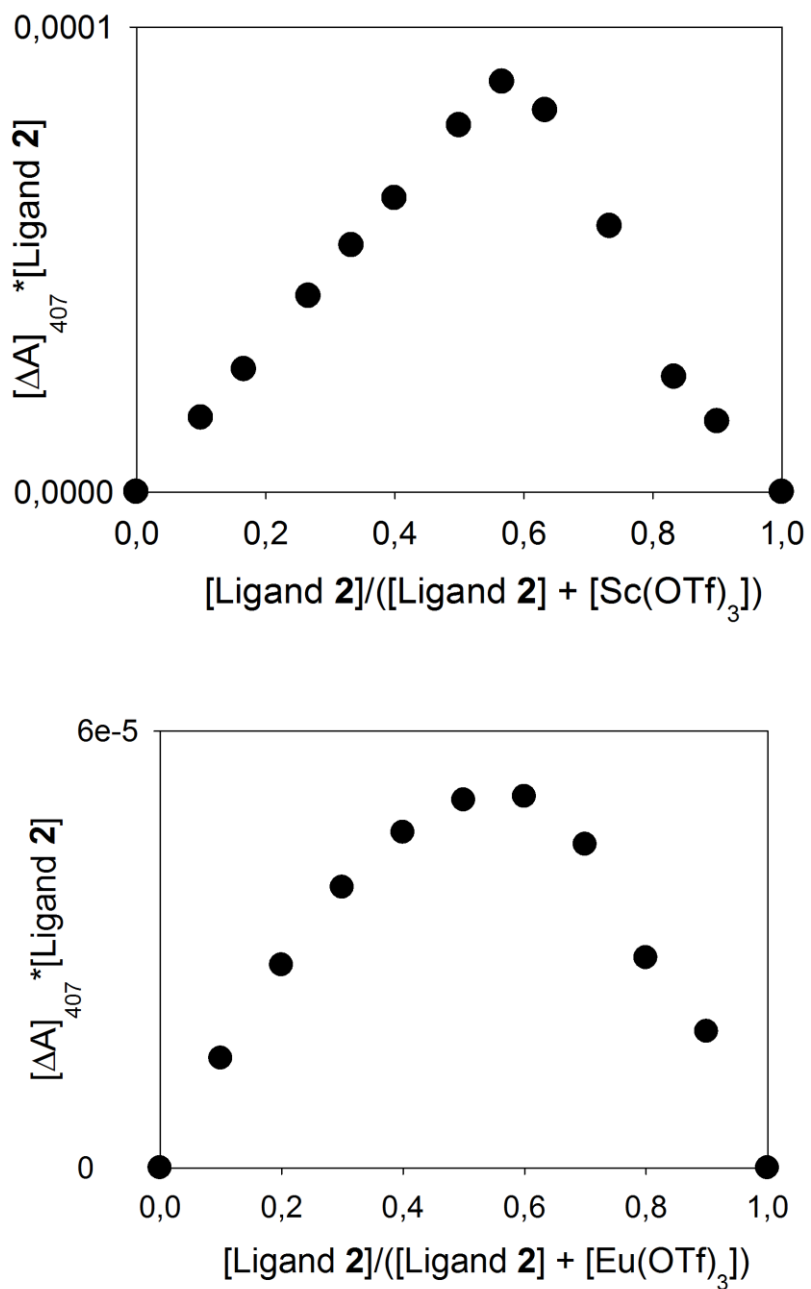

**Figure S4.** Job plot experiments of **2** with: a) top,  $\text{Sc}(\text{OTf})_3$  b) bottom,  $\text{Eu}(\text{OTf})_3$ . Total concentration of species in each case:  $76 \mu\text{M}$  in MeCN.

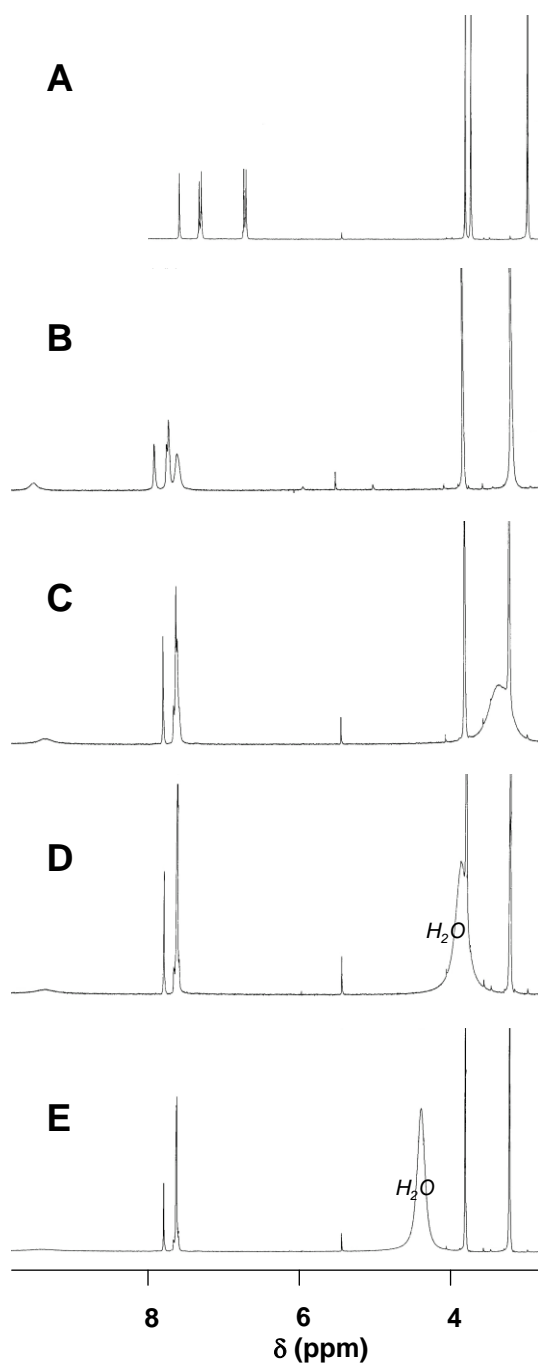

**Figure S5.** Titration of ligand **1** (0.0126 M in  $\text{CD}_3\text{CN}$ , 300 MHz) with  $\text{Sc}(\text{OTf})_3$ : A) 0 equivalents; B) 0.3 equivalents; C) 0.6 equivalents; D) 0.8 equivalents; E) 1.3 equivalents. This titration has been reduced for the making of Figure 5 in the main text

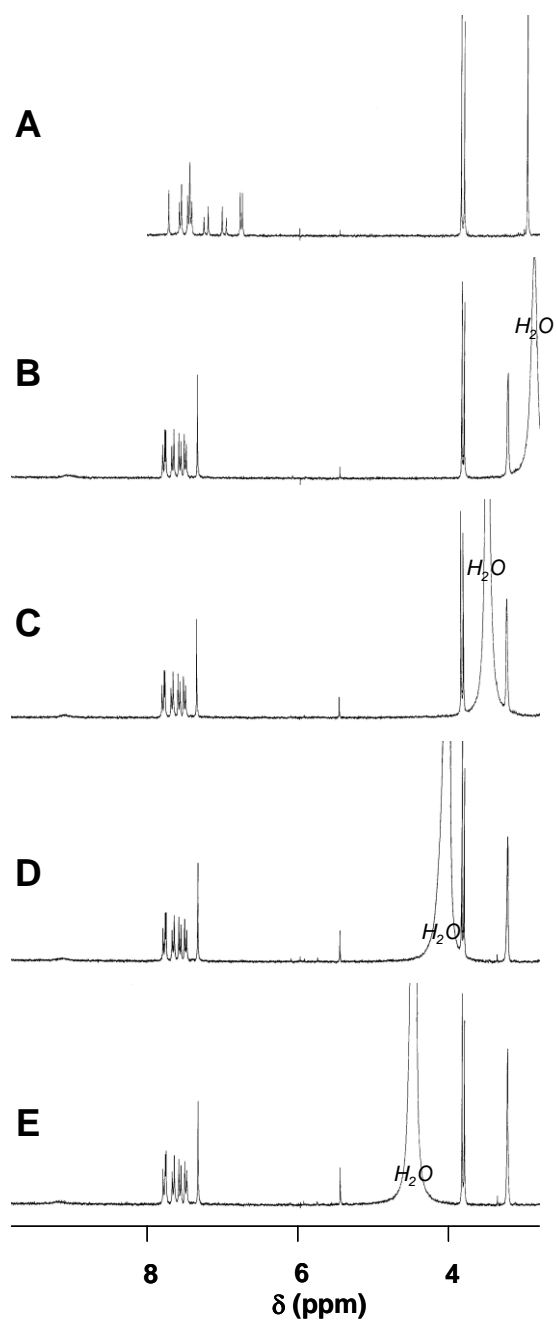

**Figure S6.** Titration of ligand **2** (0.007 M in  $\text{CD}_3\text{CN}$ ) with  $\text{Sc}(\text{OTf})_3$ : A) 0 equivalents; B) 0.3 equivalents; C) 0.6 equivalents; D) 1.1 equivalents; E) 1.9 equivalents. This titration has been reduced for the making of Figure 6 in the main text

Table S1. Titration of Ligand **1** with Sc(OTf)<sub>3</sub> (titration *a* in Figure 3)

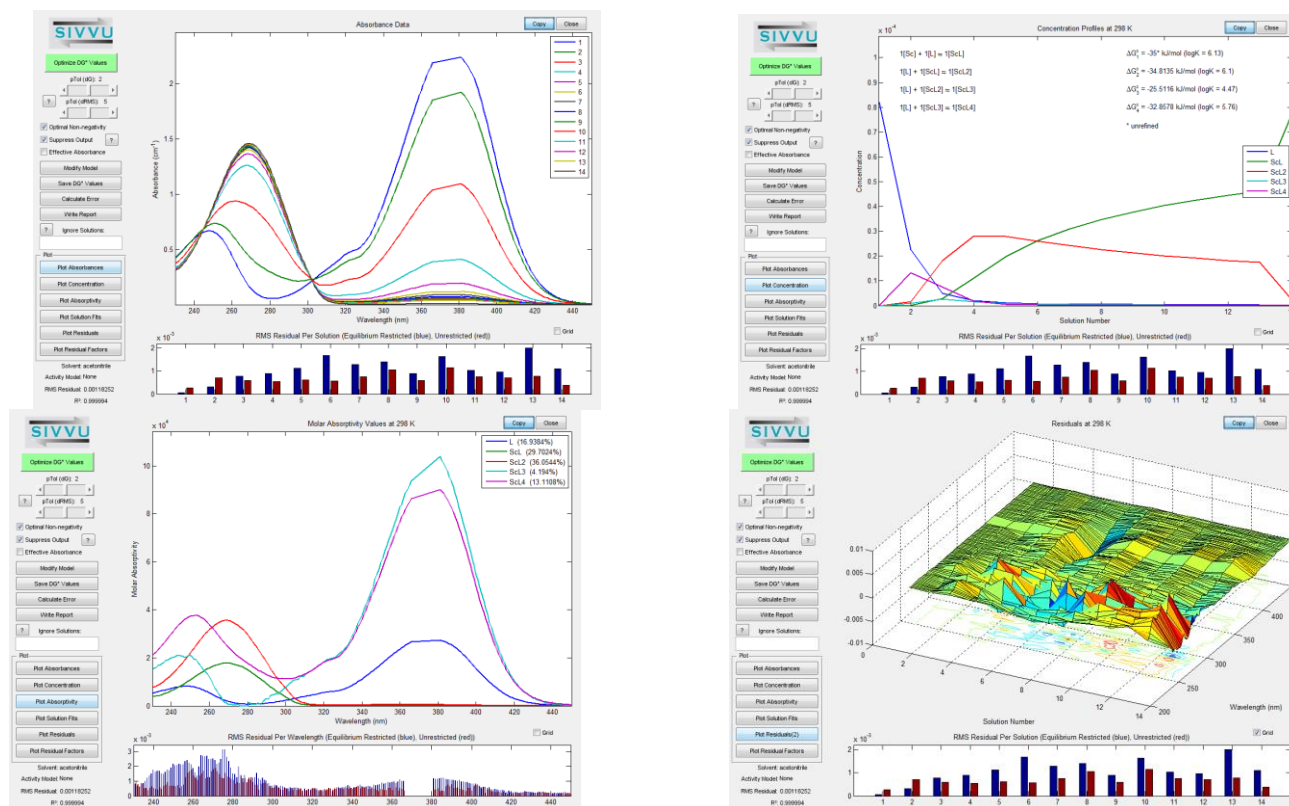

**Optimization Summary:**

Data at 298 K

Non-negativity was enforced with optimization (not truncation).

Activity Coefficients Model: None.

Species with Fixed Molar Absorptivity Curves: None.

Solutions ignored: None.

Optimized Values (kJ/mol):  $\Delta G^{\circ}_1 = -35(\text{unrefined})$ ;  $\Delta G^{\circ}_2 = -34.8(1)$ ;  $\Delta G^{\circ}_3 = -25.5(1)$ ;  $\Delta G^{\circ}_4 = -32.9(1)$ ;

Equilibrium Restricted RMS Residual (6 chemical factors): 0.0011557

Unrestricted RMS Residual (6 mathematical factors): 0.0005969

Restricted Data Reconstruction (6 chemical factors): 99.752%

Unrestricted Data Reconstruction (6 mathematical factors): 99.8181%

Remaining Error Imbedded in Absorbance Values: 0.0010009

R<sup>2</sup>: 99.9994%



Table S2. Titration of Ligand **2** with Sc(OTf)<sub>3</sub> (titration *c* in Figure 3)

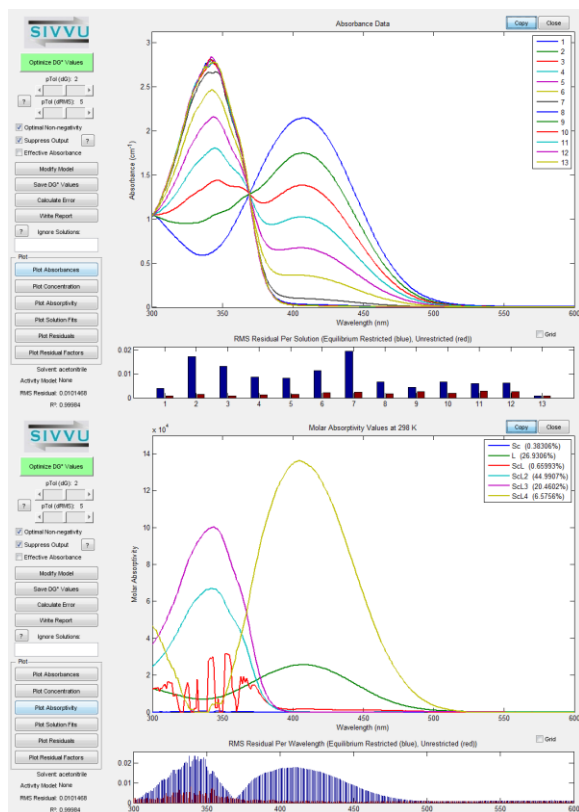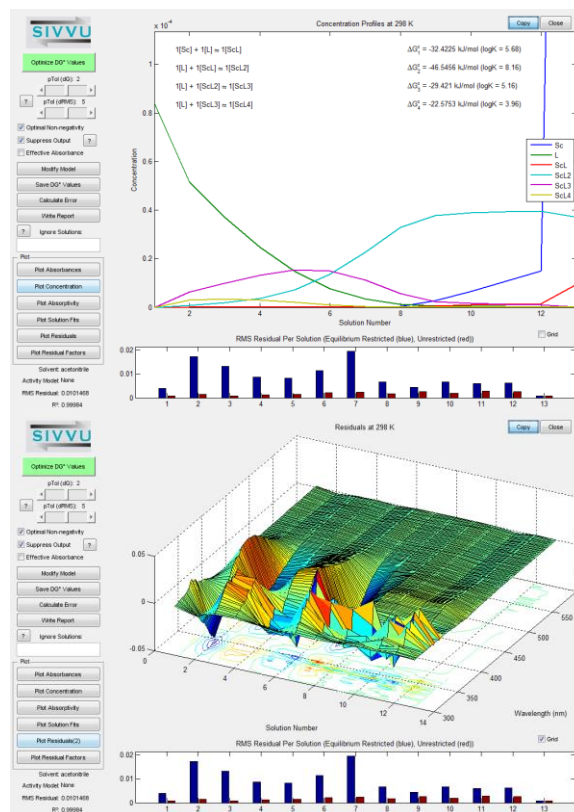

**Optimization Summary:**

Data at 298 K

Non-negativity was enforced with optimization (not truncation).

Activity Coefficients Model: None.

Species with Fixed Molar Absorptivity Curves: None.

Solutions ignored: None.

Optimized Values (kJ/mol):  $\Delta G^{\circ}_1 = -32.4(2)$ ;  $\Delta G^{\circ}_2 = -46.5(1)$ ;  $\Delta G^{\circ}_3 = -29.4(1)$ ;  $\Delta G^{\circ}_4 = -22.6(1)$ ;

Equilibrium Restricted RMS Residual (6 chemical factors): 0.010147

Unrestricted RMS Residual (6 mathematical factors): 0.0019111

Restricted Data Reconstruction (6 chemical factors): 99.3834%

Unrestricted Data Reconstruction (6 mathematical factors): 99.6497%

Remaining Error Imbedded in Absorbance Values: 0.0093941

R<sup>2</sup>: 99.984%

Table S3. Titration of Ligand **3** with Sc(OTf)<sub>3</sub> (titration *e* in Figure 3)

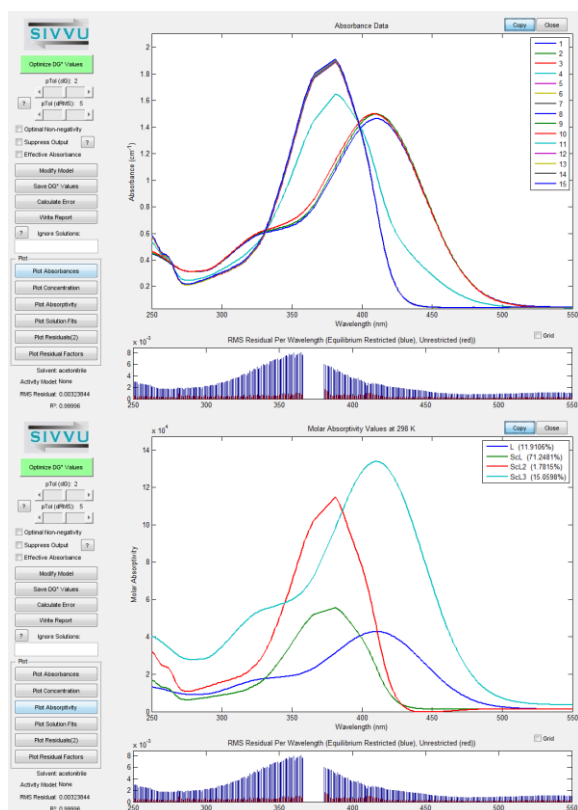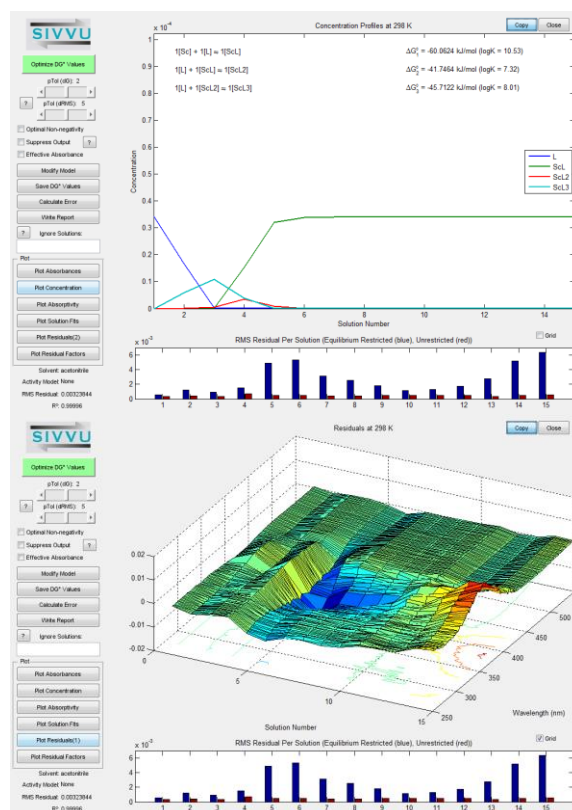

Optimization Summary:

Data at 298 K

Non-negativity was enforced with optimization (not truncation).

Activity Coefficients Model: None.

Species with Fixed Molar Absorptivity Curves: None.

Solutions ignored: None.

Optimized Values (kJ/mol):  $\Delta G^{\circ}_1 = -60.1(3)$ ;  $\Delta G^{\circ}_2 = -41.7(2)$ ;  $\Delta G^{\circ}_3 = -45.7(1)$ ;

Equilibrium Restricted RMS Residual (4 chemical factors): 0.0032382

Unrestricted RMS Residual (4 mathematical factors): 0.00045912

Restricted Data Reconstruction (4 chemical factors): 99.7735%

Unrestricted Data Reconstruction (4 mathematical factors): 99.8377%

Remaining Error Imbedded in Absorbance Values: 0.0019527

R<sup>2</sup>: 99.996%

Table S4. Titration of Ligand **1** with Eu(OTf)<sub>3</sub> (titration **b** in Figure 3)

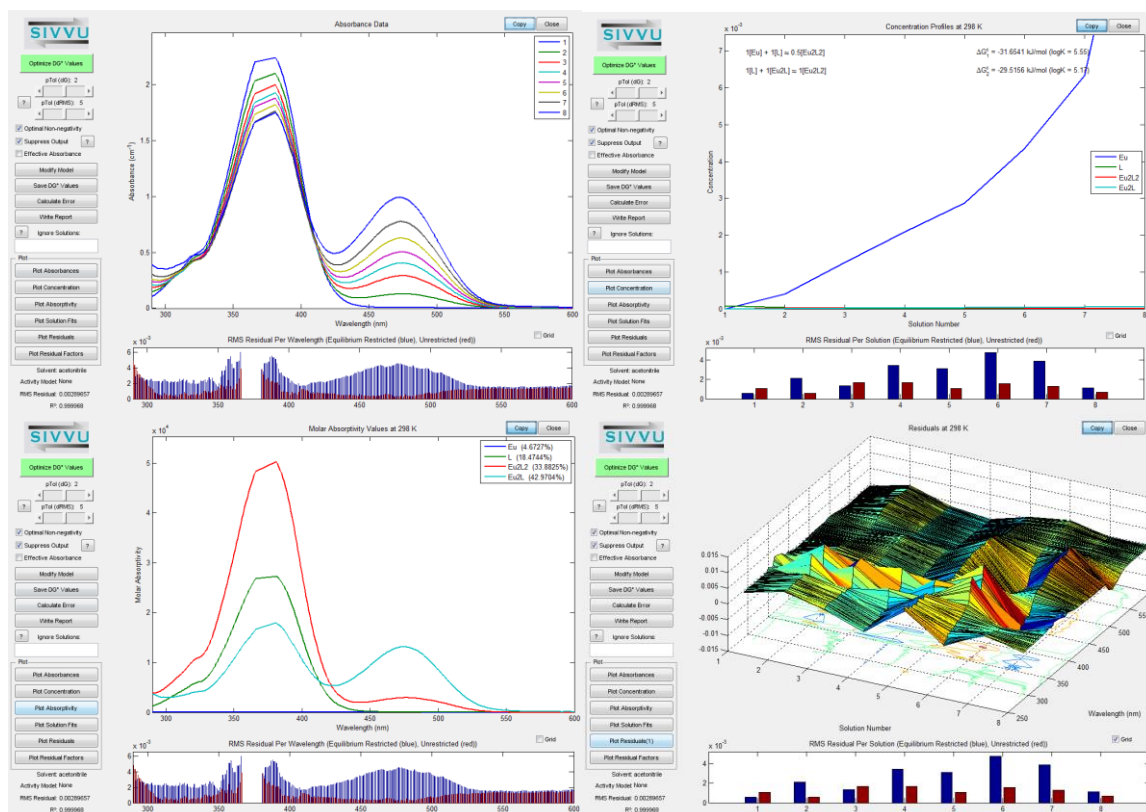

Optimization Summary:

Data at 298 K

Non-negativity was enforced with optimization (not truncation).

Activity Coefficients Model: None.

Species with Fixed Molar Absorptivity Curves: None.

Solutions ignored: None.

Optimized Values (kJ/mol):  $\Delta G^{\circ}_1 = -31.65(6)$ ;  $\Delta G^{\circ}_2 = -29.52(5)$ ;

Equilibrium Restricted RMS Residual (4 chemical factors): 0.0028966

Unrestricted RMS Residual (4 mathematical factors): 0.0012714

Restricted Data Reconstruction (4 chemical factors): 99.701%

Unrestricted Data Reconstruction (4 mathematical factors): 99.7264%

Remaining Error Imbedded in Absorbance Values: 0.0028966

R<sup>2</sup>: 99.9968%

Table S5. Titration of Ligand **2** with Eu(OTf)<sub>3</sub> (titration *d* in Figure 3)

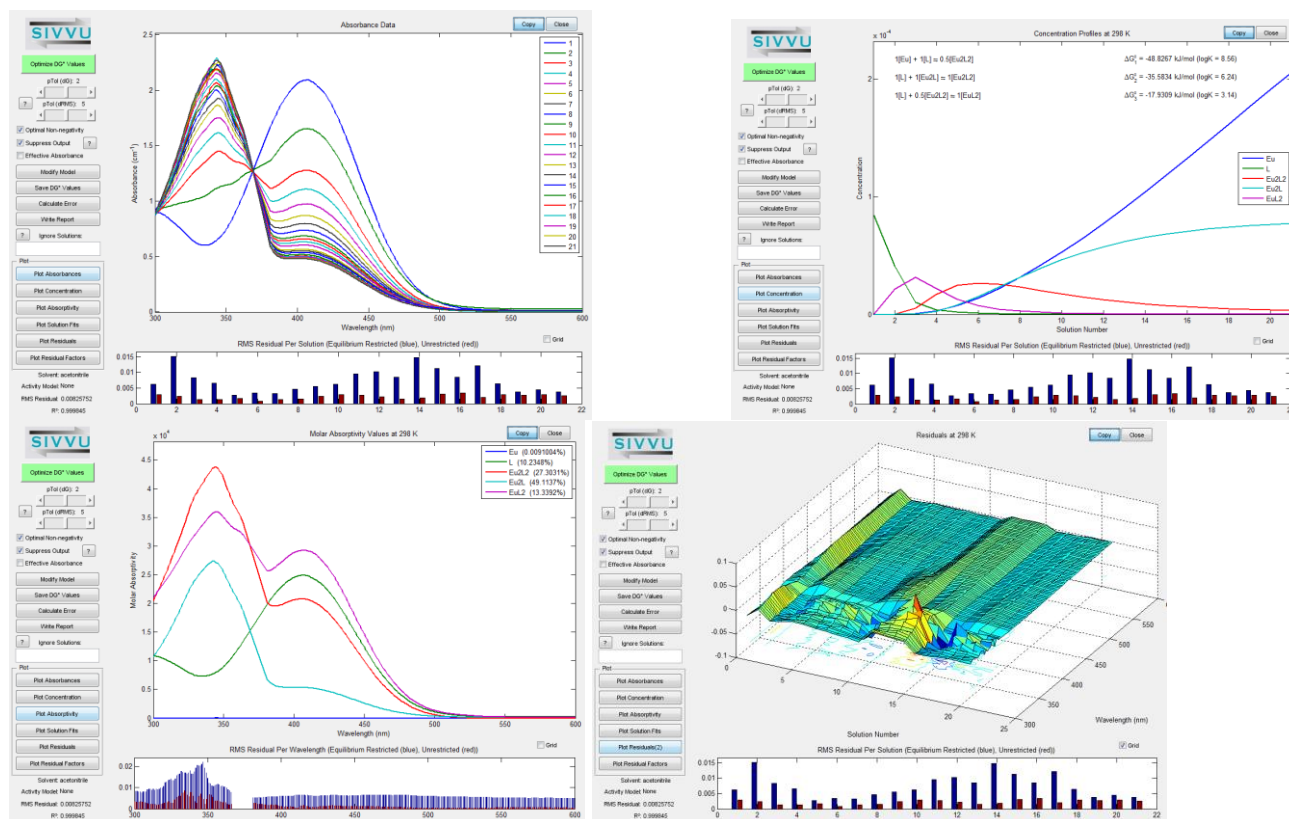

Optimization Summary:

Data at 298 K

Non-negativity was enforced with optimization (not truncation).

Activity Coefficients Model: None.

Species with Fixed Molar Absorptivity Curves: None.

Solutions ignored: None.

Optimized Values (kJ/mol):  $\Delta G^{\circ}_1 = -48.8(1)$ ;  $\Delta G^{\circ}_2 = -35.6(1)$ ;  $\Delta G^{\circ}_3 = -17.9(2)$ ;

Equilibrium Restricted RMS Residual (5 chemical factors): 0.0082575

Unrestricted RMS Residual (5 mathematical factors): 0.0022966

Restricted Data Reconstruction (5 chemical factors): 98.8921%

Unrestricted Data Reconstruction (5 mathematical factors): 99.3284%

Remaining Error Imbedded in Absorbance Values: 0.0046161

R<sup>2</sup>: 99.9845%

Table S6. Titration of Ligand **3** with Eu(OTf)<sub>3</sub> (titration *f* in Figure 3)

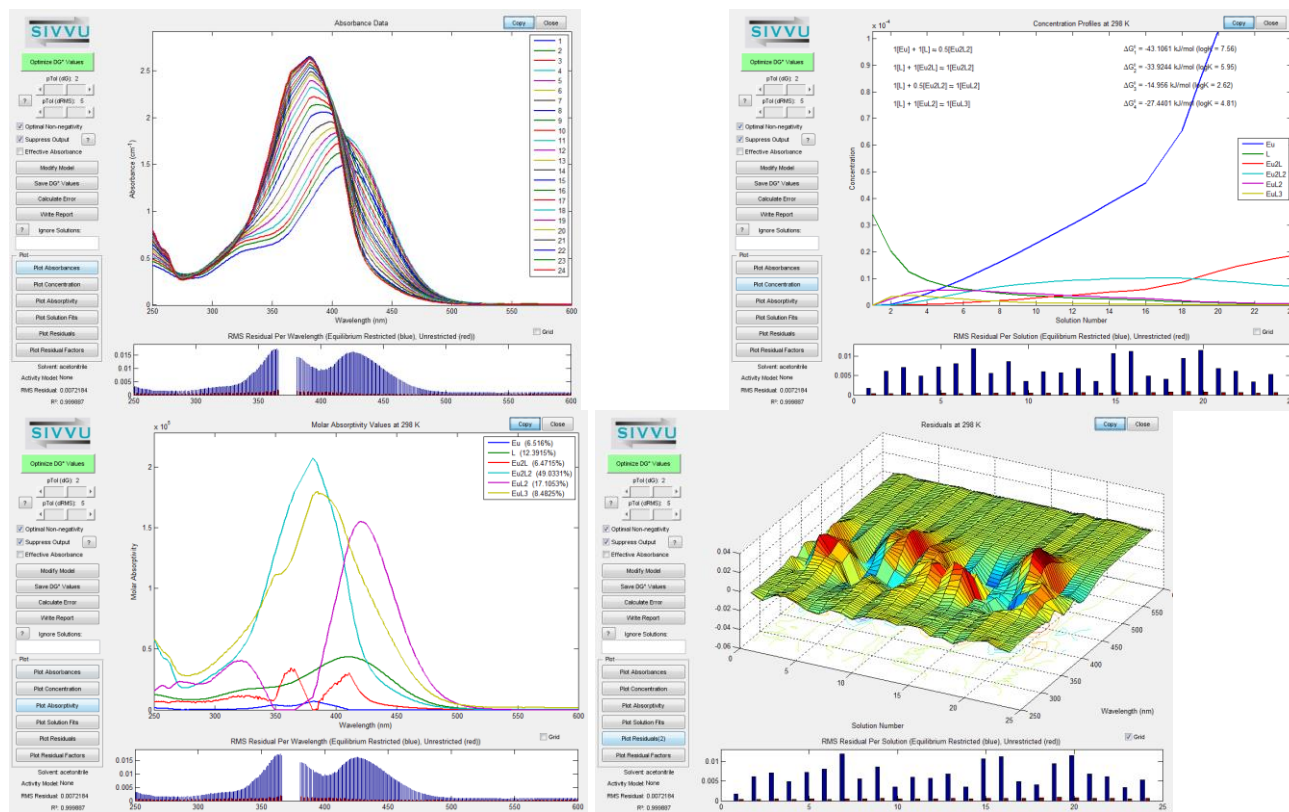

Optimization Summary:

Data at 298 K

Non-negativity was enforced with optimization (not truncation).

Activity Coefficients Model: None.

Species with Fixed Molar Absorptivity Curves: None.

Solutions ignored: None.

Optimized Values (kJ/mol):  $\Delta G^{\circ}_1 = -43.1(1)$ ;  $\Delta G^{\circ}_2 = -33.9(1)$ ;  $\Delta G^{\circ}_3 = -15.0(2)$ ;  $\Delta G^{\circ}_4 = -27.4(2).9$ ;

Equilibrium Restricted RMS Residual (6 chemical factors): 0.0072184

Unrestricted RMS Residual (6 mathematical factors): 0.00055748

Restricted Data Reconstruction (6 chemical factors): 99.847%

Unrestricted Data Reconstruction (6 mathematical factors): 99.7912%

Remaining Error Imbedded in Absorbance Values: 0.0041675

R<sup>2</sup>: 99.9887%
